# Supplementary material for: Intermolecular hinge—a new function of the C–H⋯π hydrogen bond
Source: Royal Society of Chemistry journal article supplement (doi:10.1039/b700211d), 2007-01-01

|                                                      | Reference                                                                                                                                    | CD (Ang) | H16...O2 (2 <sub>1</sub> ) | H17...O3 (2 <sub>1</sub> ) | H10...π (2 <sub>1</sub> ) |
|------------------------------------------------------|----------------------------------------------------------------------------------------------------------------------------------------------|----------|----------------------------|----------------------------|---------------------------|
| 1                                                    | F.Toda, K.Tanaka, H.Ueda, T.Oshima, <i>Isr. J. Chem.</i> , 1985, <b>25</b> , 338                                                             | 12.446   | 2.96                       | 2.79                       | 2.73                      |
| 2                                                    | R.O.Gould, M.D.Walkinshaw, <i>J. Am. Chem. Soc.</i> , 1984, <b>106</b> , 7840                                                                | 12.423   | 2.76                       | 2.70                       | 2.72                      |
| 2                                                    | R.O.Gould, M.D.Walkinshaw, <i>J. Am. Chem. Soc.</i> , 1984, <b>106</b> , 7840                                                                | 12.423   | 2.71                       | 2.76                       | 2.83                      |
| 3                                                    | S.S.B.Glover, R.O.Gould, M.D.Walkinshaw, <i>Acta Cryst.</i> , 1985, <b>C41</b> , 990                                                         | 12.337   | 3.02                       | 2.79                       | 2.70                      |
| 4                                                    | G.Quinkert, H.-G.Schmalz, E.M.Dzierzynski, G.Durner, J.W.Bats, <i>Angew. Chem., Int. Ed.</i> , 1986, <b>25</b> , 992                         | 12.455   | 2.77                       | 2.61                       | 2.84                      |
| 5                                                    | S.E.Boiadjev, R.V.Person, G.Puzicha, C.Knobler, E.Maverick, K.N.Trueblood, D.A.Lightner, <i>J. Am. Chem. Soc.</i> , 1992, <b>114</b> , 10123 | 12.383   | 3.03                       | 2.97                       | 2.77                      |
| 6                                                    | A.Białońska, Z.Ciunik, <i>Acta Cryst.</i> , 2004, <b>C60</b> , o853                                                                          | 12.704   | 2.58                       | 2.65                       | 2.89                      |
| 7                                                    | A.Białońska, Z.Ciunik, <i>Acta Cryst.</i> , 2004, <b>C60</b> , o853                                                                          | 12.329   | 2.90                       | 2.84                       | 2.62                      |
| 8                                                    | F.J.J.Dijksma, R.O.Gould, S.Parsons, P.Taylor, M.D.Walkinshaw, <i>Chem. Commun.</i> , 1998, 745                                              | 12.666   | 2.70                       | 2.68                       | 2.93                      |
| 9                                                    | F.J.J.Dijksma, R.O.Gould, S.Parsons, P.Taylor, M.D.Walkinshaw, <i>Chem. Commun.</i> , 1998, 745                                              | 12.366   | 2.64                       | 2.49                       | 2.93                      |
| 9                                                    | F.J.J.Dijksma, R.O.Gould, S.Parsons, P.Taylor, M.D.Walkinshaw, <i>Chem. Commun.</i> , 1998, 745                                              | 12.366   | 2.75                       | 2.60                       | 2.90                      |
| 10                                                   | A.Białońska, Z.Ciunik, T.Popek, T.Lis, <i>Acta Cryst.</i> , 2005, <b>C61</b> , o88                                                           | 12.338   | 2.59                       | 2.44                       | 2.67                      |
| 10                                                   | A.Białońska, Z.Ciunik, T.Popek, T.Lis, <i>Acta Cryst.</i> , 2005, <b>C61</b> , o88                                                           | 12.338   | 2.59                       | 2.47                       | 2.62                      |
| 11                                                   | F.J.J.Dijksma, R.O.Gould, S.Parsons, M.D.Walkinshaw, <i>Acta Cryst.</i> , 1998, <b>C54</b> , 1948                                            | 12.298   | 2.56                       | 2.48                       | 2.67                      |
| 12                                                   | J.B.Laursen, C.G.Jorgensen, J.Nielsen, <i>Bioorg. Med. Chem.</i> , 2003, <b>11</b> , 723                                                     | 12.17    | 2.51                       | 2.37                       | 2.69                      |
| 13                                                   | G.Smith, U.D.Wermuth, J.M.White, <i>Acta Cryst.</i> , 2005, <b>C61</b> , o621                                                                | 12.365   | 2.55                       | 2.55                       | 2.66                      |
| 14                                                   | G.Smith, U.D.Wermuth, J.M.White, <i>Acta Cryst.</i> , 2005, <b>C61</b> , o621                                                                | 12.365   | 2.74                       | 2.61                       | 2.71                      |
| 15                                                   | A.Białońska, Z.Ciunik, <i>Acta Cryst.</i> , 2005, <b>E61</b> , o4222                                                                         | 12.177   | 2.50                       | 2.40                       | 2.68                      |
| 16                                                   | G.Smith, U.D.Wermuth, J.M.White, <i>Acta Cryst.</i> , 2006, <b>C62</b> , o353                                                                | 12.298   | 2.66                       | 2.47                       | 2.71                      |
| 16                                                   | G.Smith, U.D.Wermuth, J.M.White, <i>Acta Cryst.</i> , 2006, <b>C62</b> , o353                                                                | 12.298   | 2.76                       | 2.56                       | 2.68                      |
| 17                                                   | G.Smith, U.D.Wermuth, J.M.White, <i>Acta Cryst.</i> , 2006, <b>C62</b> , o353                                                                | 12.272   | 2.84                       | 2.73                       | 2.68                      |
| 18                                                   | G.Smith, U.D.Wermuth, D.J.Young, J.M.White, <i>Acta Cryst.</i> , 2006, <b>E62</b> , o1553                                                    | 12.456   | 2.65                       | 2.55                       | 2.98                      |
| 19                                                   | G.Smith, U.D.Wermuth, P.C.Healy, J.M.White, <i>Acta Cryst.</i> , 2006, <b>C62</b> , o203                                                     | 12.200   | 2.90                       | 2.73                       | 2.73                      |
| 20                                                   | A.Białońska, Z.Ciunik, <i>Cryst Eng Comm</i> , 2006, <b>8</b> , 66                                                                           | 12.056   | 2.70                       | 2.60                       | 2.63                      |
| 21                                                   | A.Białońska, Z.Ciunik, <i>Cryst Eng Comm</i> , 2006, <b>8</b> , 66                                                                           | 12.283   | 2.61                       | 2.58                       | 2.77                      |
| 22                                                   | A.Białońska, Z.Ciunik, <i>Cryst Eng Comm</i> , 2006, <b>8</b> , 66                                                                           | 12.465   | 2.70                       | 2.69                       | 2.77                      |
| 23                                                   | A.Białońska, Z.Ciunik, <i>Cryst Eng Comm</i> , 2006, <b>8</b> , 66                                                                           | 12.374   | 2.74                       | 2.74                       | 2.60                      |
| 24                                                   | G.Smith, U.D.Wermuth, P.C.Healy, J.M.White, <i>Acta Cryst.</i> , 2006, <b>C62</b> , o203                                                     | 11.531   | 4.05                       | 2.77                       | 3.11                      |
| BH <sup>+</sup> Br <sup>-</sup><br>2H <sub>2</sub> O | A.Białońska, Z.Ciunik, submitted to <i>Cryst Eng Comm</i> ,                                                                                  | 11.848   | 3.50                       | 2.73                       | 2.64                      |

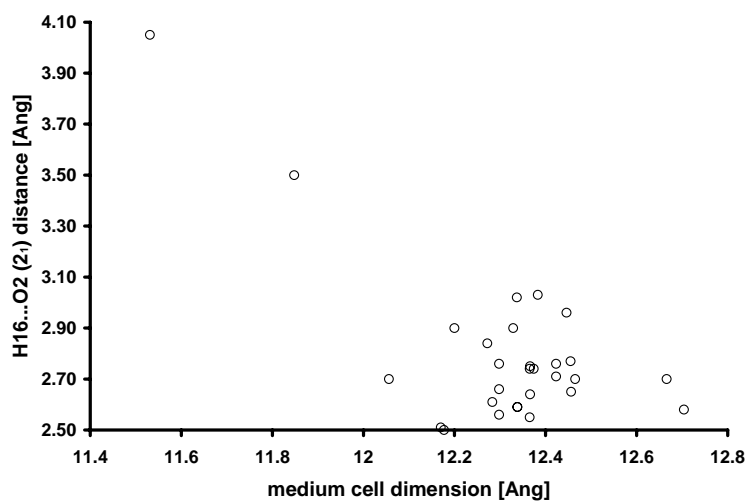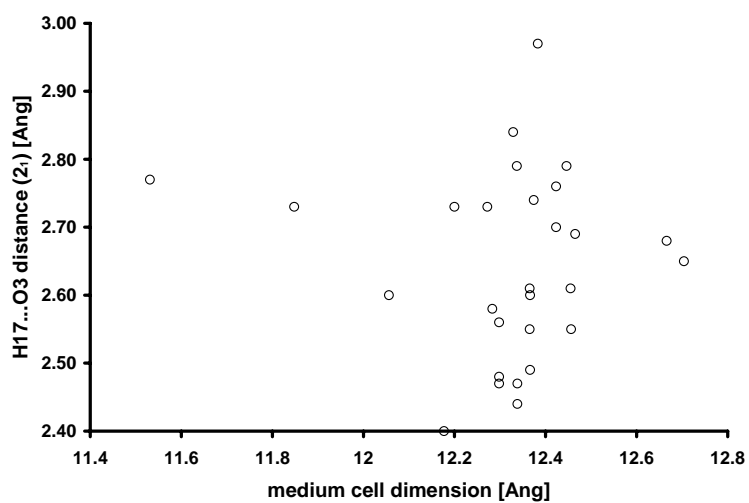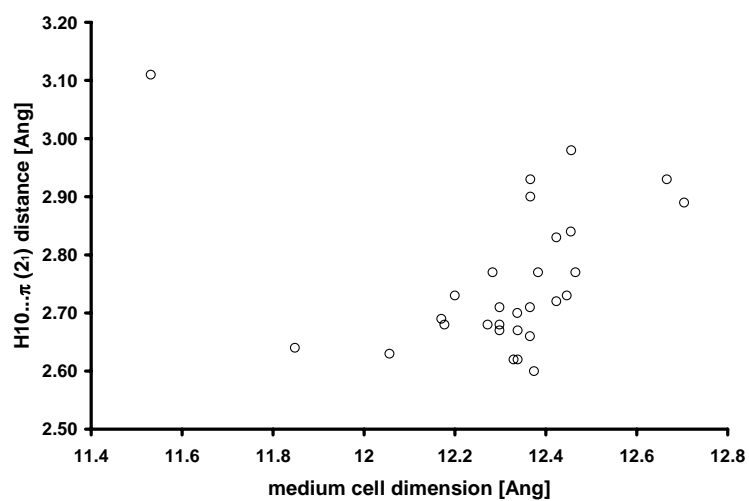

|                                                      | Reference                                                                                                                                     | CD<br>(Ang) | O2 C16<br>O2(2 <sub>1</sub> )<br>C16(2 <sub>1</sub> ) | O3 C17<br>O3(2 <sub>1</sub> )<br>C17(2 <sub>1</sub> ) | Cp1 C10<br>Cp1(2 <sub>1</sub> )<br>C10(2 <sub>1</sub> ) |
|------------------------------------------------------|-----------------------------------------------------------------------------------------------------------------------------------------------|-------------|-------------------------------------------------------|-------------------------------------------------------|---------------------------------------------------------|
| 1                                                    | F.Toda, K.Tanaka, H.Ueda, T.Oshima, <i>Isr. J. Chem.</i> , 1985, <b>25</b> , 338                                                              | 12.446      | 26.9                                                  | 76.1                                                  | 171.6                                                   |
| 2                                                    | R.O.Gould, M.D.Walkinshaw, <i>J. Am. Chem. Soc.</i> , 1984, <b>106</b> , 7840                                                                 | 12.423      | 40.1                                                  | 85.8                                                  | 175.8                                                   |
| 2                                                    | R.O.Gould, M.D.Walkinshaw, <i>J. Am. Chem. Soc.</i> , 1984, <b>106</b> , 7840                                                                 | 12.423      | 25.3                                                  | 77.8                                                  | 175.5                                                   |
| 3                                                    | S.S.B.Glover, R.O.Gould, M.D.Walkinshaw, <i>Acta Cryst.</i> , 1985, <b>C41</b> , 990                                                          | 12.337      | 26.6                                                  | 75.0                                                  | 170.8                                                   |
| 4                                                    | G.Quinkert, H.-G.Schmalz, E.M.Dzierzynski, G.Durner, J.W.Bats, <i>Angew. Chem., Int. Ed.</i> , 1986, <b>25</b> , 992                          | 12.455      | 30.0                                                  | 84.4                                                  | 173.9                                                   |
| 5                                                    | S.E.Boiadjiev, R.V.Person, G.Puzicha, C.Knobler, E.Maverick, K.N.Trueblood, D.A.Lightner, <i>J. Am. Chem. Soc.</i> , 1992, <b>114</b> , 10123 | 12.383      | 33.1                                                  | 84.1                                                  | 176.1                                                   |
| 6                                                    | A.Białońska, Z.Ciunik, <i>Acta Cryst.</i> , 2004, <b>C60</b> , o853                                                                           | 12.704      | 39.2                                                  | 91.3                                                  | 180.8                                                   |
| 7                                                    | A.Białońska, Z.Ciunik, <i>Acta Cryst.</i> , 2004, <b>C60</b> , o853                                                                           | 12.329      | 31.4                                                  | 82.0                                                  | 175.7                                                   |
| 8                                                    | F.J.J.Dijksma, R.O.Gould, S.Parsons, P.Taylor, M.D.Walkinshaw, <i>Chem. Commun.</i> , 1998, 745                                               | 12.666      | 34.0                                                  | 92.3                                                  | 178.5                                                   |
| 9                                                    | F.J.J.Dijksma, R.O.Gould, S.Parsons, P.Taylor, M.D.Walkinshaw, <i>Chem. Commun.</i> , 1998, 745                                               | 12.366      | 30.4                                                  | 83.2                                                  | 172.5                                                   |
| 9                                                    | F.J.J.Dijksma, R.O.Gould, S.Parsons, P.Taylor, M.D.Walkinshaw, <i>Chem. Commun.</i> , 1998, 745                                               | 12.366      | 26.3                                                  | 79.9                                                  | 171.5                                                   |
| 10                                                   | A.Białońska, Z.Ciunik, T.Popek, T.Lis, <i>Acta Cryst.</i> , 2005, <b>C61</b> , o88                                                            | 12.338      | 30.9                                                  | 83.4                                                  | 173.5                                                   |
| 10                                                   | A.Białońska, Z.Ciunik, T.Popek, T.Lis, <i>Acta Cryst.</i> , 2005, <b>C61</b> , o88                                                            | 12.338      | 30.2                                                  | 83.8                                                  | 173.8                                                   |
| 11                                                   | F.J.J.Dijksma, R.O.Gould, S.Parsons, M.D.Walkinshaw, <i>Acta Cryst.</i> , 1998, <b>C54</b> , 1948                                             | 12.298      | 28.8                                                  | 80.5                                                  | 172.7                                                   |
| 12                                                   | J.B.Laursen, C.G.Jorgensen, J.Nielsen, <i>Bioorg. Med. Chem.</i> , 2003, <b>11</b> , 723                                                      | 12.17       | 27.2                                                  | 79.0                                                  | 171.1                                                   |
| 13                                                   | G.Smith, U.D.Wermuth, J.M.White, <i>Acta Cryst.</i> , 2005, <b>C61</b> , o621                                                                 | 12.365      | 33.1                                                  | 86.6                                                  | 175.4                                                   |
| 14                                                   | G.Smith, U.D.Wermuth, J.M.White, <i>Acta Cryst.</i> , 2005, <b>C61</b> , o621                                                                 | 12.365      | 32.7                                                  | 85.0                                                  | 174.9                                                   |
| 15                                                   | A.Białońska, Z.Ciunik, <i>Acta Cryst.</i> , 2005, <b>E61</b> , o4222                                                                          | 12.177      | 27.4                                                  | 80.0                                                  | 171.4                                                   |
| 16                                                   | G.Smith, U.D.Wermuth, J.M.White, <i>Acta Cryst.</i> , 2006, <b>C62</b> , o353                                                                 | 12.298      | 28.1                                                  | 83.8                                                  | 172.8                                                   |
| 16                                                   | G.Smith, U.D.Wermuth, J.M.White, <i>Acta Cryst.</i> , 2006, <b>C62</b> , o353                                                                 | 12.298      | 31.2                                                  | 85.8                                                  | 173.0                                                   |
| 17                                                   | G.Smith, U.D.Wermuth, J.M.White, <i>Acta Cryst.</i> , 2006, <b>C62</b> , o353                                                                 | 12.272      | 36.0                                                  | 84.1                                                  | 171.1                                                   |
| 18                                                   | G.Smith, U.D.Wermuth, D.J.Young, J.M.White, <i>Acta Cryst.</i> , 2006, <b>E62</b> , o1553                                                     | 12.456      | 33.6                                                  | 91.3                                                  | 176.1                                                   |
| 19                                                   | G.Smith, U.D.Wermuth, P.C.Healy, J.M.White, <i>Acta Cryst.</i> , 2006, <b>C62</b> , o203                                                      | 12.200      | 34.1                                                  | 82.3                                                  | 174.4                                                   |
| 20                                                   | A.Białońska, Z.Ciunik, <i>Cryst Eng Comm</i> , 2006, <b>8</b> , 66                                                                            | 12.056      | 24.7                                                  | 70.9                                                  | 170.3                                                   |
| 21                                                   | A.Białońska, Z.Ciunik, <i>Cryst Eng Comm</i> , 2006, <b>8</b> , 66                                                                            | 12.283      | 32.9                                                  | 80.1                                                  | 173.4                                                   |
| 22                                                   | A.Białońska, Z.Ciunik, <i>Cryst Eng Comm</i> , 2006, <b>8</b> , 66                                                                            | 12.465      | 27.0                                                  | 74.1                                                  | 173.1                                                   |
| 23                                                   | A.Białońska, Z.Ciunik, <i>Cryst Eng Comm</i> , 2006, <b>8</b> , 66                                                                            | 12.374      | 32.1                                                  | 87.2                                                  | 175.5                                                   |
| 24                                                   | G.Smith, U.D.Wermuth, P.C.Healy, J.M.White, <i>Acta Cryst.</i> , 2006, <b>C62</b> , o203                                                      | 11.531      | 8.9                                                   | 49.1                                                  | 148.2                                                   |
| BH <sup>+</sup> Br <sup>-</sup><br>2H <sub>2</sub> O | A.Białońska, Z.Ciunik, submitted to <i>Cryst Eng Comm</i> ,                                                                                   | 11.848      | 11.8                                                  | 51.0                                                  | 154.3                                                   |

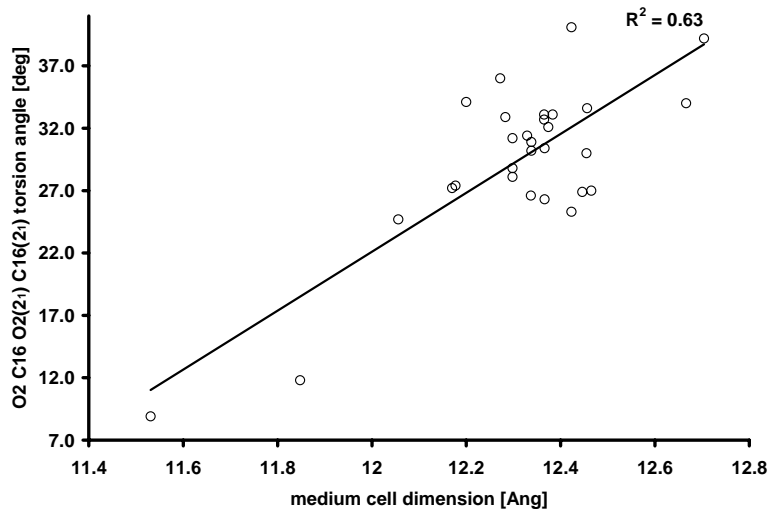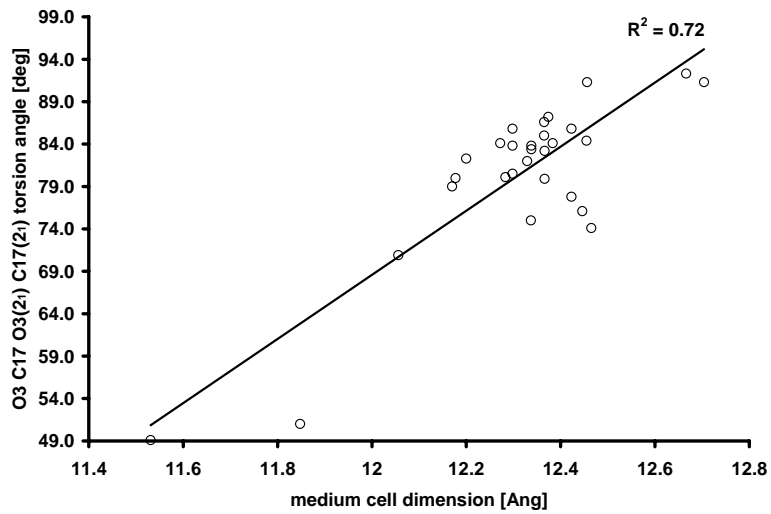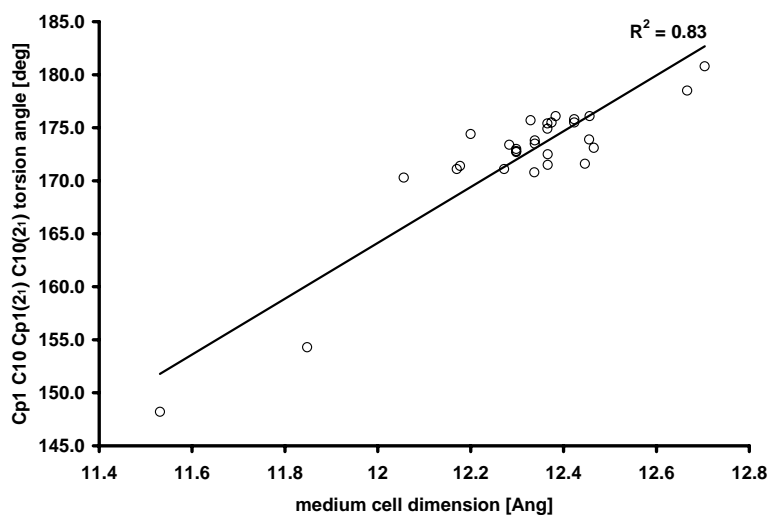

Supplement: b700211d.pdf [file b700211d.pdf]
